# Supplementary material for: Potential contributions of nitrifiers and denitrifiers to nitrous oxide sources and sinks in China’s estuarine and coastal areas
Source: Copernicus journal article supplement (doi:10.5194/bg-2022-43), 2022-04-13
Supplement: Supplementary file 1 [file bg-2022-43-supplement.zip]

*Supplement of*

**Potential contributions of nitrifiers and denitrifiers to  
nitrous oxide sources and sinks in China's estuarine and  
coastal areas**

Xiaofeng Dai et al.

*Correspondence to:* Yao Zhang (yaozhang@xmu.edu.cn)

**Table S1 (Excel file).** Sampling information in the four estuaries. BS, Bohai Sea; YRE, Yangtze River Estuary; JRE, Jiulong River Estuary; PRE, Pearl River Estuary. S, surface layer; M, middle layer; B, bottom layer.

**Table S3 (Excel file).** Gene abundance (copies L<sup>-1</sup>) in the four estuaries. BS, Bohai Sea; YRE, Yangtze River Estuary; JRE, Jiulong River Estuary; PRE, Pearl River Estuary; AOA, ammonia-oxidizing archaea; AOB, ammonia-oxidizing bacteria; BD, below detection. S, surface layer; M, middle layer; B, bottom layer.

**Table S4 (Excel file).** Gene transcript abundance (transcripts L<sup>-1</sup>) in the four estuaries. BS, Bohai Sea; YRE, Yangtze River Estuary; JRE, Jiulong River Estuary; PRE, Pearl River Estuary; AOA, ammonia-oxidizing archaea; AOB, ammonia-oxidizing bacteria; BD, below detection. S, surface layer; M, middle layer; B, bottom layer.

**Table S2. Specific primer sets and reactions for PCR and qPCR.**

| Gene                       | Reaction | Primer                    | Primer sequence 5'–3'                             | Mixture                                                                                                                         | Program | References                                            |
|----------------------------|----------|---------------------------|---------------------------------------------------|---------------------------------------------------------------------------------------------------------------------------------|---------|-------------------------------------------------------|
| <b>Archaeal-<br/>amoA</b>  | PCR      | Arch-amoAF<br>Arch-amoAR  | STAATGGTCTGGCTTAGACG<br>GCGGCCATCCATCTGTATGT      | R                                                                                                                               | R       | Francis et al., 2005                                  |
|                            | qPCR     | Arch-amoAFA<br>Arch-amoAR | GGGGTTTCTACTGGTGGT<br>GCGGCCATCCATCTGTATGT        | 20 µL reaction mixture:<br>SYBR Green II mix<br>(Takara, Bio Inc.) 10 µL,<br>primers 0.6 µM, BSA 8 µg,<br>DNA/cDNA template 1µL | R       | Beman et al., 2008                                    |
| <b>Bacterial-<br/>amoA</b> | PCR      | amoA-34F<br>amoA-2R       | GCGGCRAAAATGCCGCCGGAAGCG<br>CCCCTCKGSAAAGCCTTCTTC | R                                                                                                                               | R       | Molina et al., 2007<br>Rotthauwe and Witzel,<br>1997; |
|                            | qPCR     | amoA-1F<br>amoA-r New     | GGGGTTTCTACTGGTGGT<br>CCCCTCBGSAAAVCCTTCTTC       | 20 µl reaction mixture:<br>SYBR Green II mix<br>(Takara, Bio Inc.) 10 µL,<br>primers 0.4 µM, BSA 4 µg,<br>DNA/cDNA template 1µL | R       | Rotthauwe and Witzel,<br>1997;<br>Hornek et al., 2006 |
| <b>nirK</b>                | PCR      | F1aCu<br>R3Cu             | ATCATGGTSC TGCCGCG<br>GCCTCGATCAG(A/G)TTGTGGTT    | R                                                                                                                               | R       | Braker et al., 1998                                   |
|                            | qPCR     | nirK876<br>nirK1040       | ATYGGCGGV CAYGGCGA<br>GCCTCGATCAGRTT RTGG         | 20 µL reaction mixture:<br>SYBR Green II mix<br>(Takara, Bio Inc.) 10 µL,<br>primers 1 µM, BSA 8 µg,<br>DNA/cDNA template 1µL   | R       | Henry et al., 2004                                    |
| <b>nirS</b>                | PCR      | nirS-1F                   | CCTAYTGGCCGCCRCART                                | R                                                                                                                               | R       | Braker et al., 1998                                   |

|                       |      |                           |                                                 |                                                                                                                                      |                   |                                   |
|-----------------------|------|---------------------------|-------------------------------------------------|--------------------------------------------------------------------------------------------------------------------------------------|-------------------|-----------------------------------|
|                       |      | nirS-6R                   | CGTTGAACTTRCCGGT                                |                                                                                                                                      |                   |                                   |
|                       | qPCR | nirS-1F<br>nirS-3R        | CCTAYTGGCCGCCRCART<br>GCCGCCGTCRTGVAGGAA        | 20 µL reaction mixture:<br>SYBR Green II mix<br>(Takara, Bio Inc.) 10 µL,<br>primers 0.8 µM, BSA 4 µg,<br>DNA/cDNA template 1µL      |                   | Braker et al., 1998               |
| <b><i>nosZ I</i></b>  | PCR  | nosZ1F<br>nosZ2R          | WCSYTGTTCMTCGACAGCCAG<br>CAKRTGCAKSGCRTGGCAGAA  | R                                                                                                                                    | R                 | Henry et al., 2006                |
|                       | qPCR | nosZ2F<br>nosZ2R          | CGCRACGGCAASAAGGTSMSST<br>CAKRTGCAKSGCRTGGCAGAA | 20 µL reaction mixture:<br>SYBR Green II mix<br>(Takara, Bio Inc.) 10 µL,<br>primers 1.25 µM, BSA 10<br>µg, DNA/cDNA template<br>1µL | R                 | Henry et al., 2006                |
| <b><i>nosZ II</i></b> | PCR  | nosZ-II-F<br>nosZ-II-R    | CTIGGICCIYTKCAYAC<br>GCIGARCARAAITCBGTRC        | R                                                                                                                                    | R                 | Jones et al., 2013                |
|                       | qPCR | nosZ-II-F<br>nosZ-II-Rnew | CTIGGICCIYTKCAYAC<br>KGCRTAGTGIGGYTCDC          | 20 µL reaction mixture:<br>SYBR Green II mix<br>(Takara, Bio Inc.) 10 µL,<br>primers 1.25 µM, BSA 10<br>µg, DNA/cDNA template<br>1µL | See the main text | Jones et al., 2013;<br>This study |

R, PCR reaction mixtures and conditions follow corresponding references.

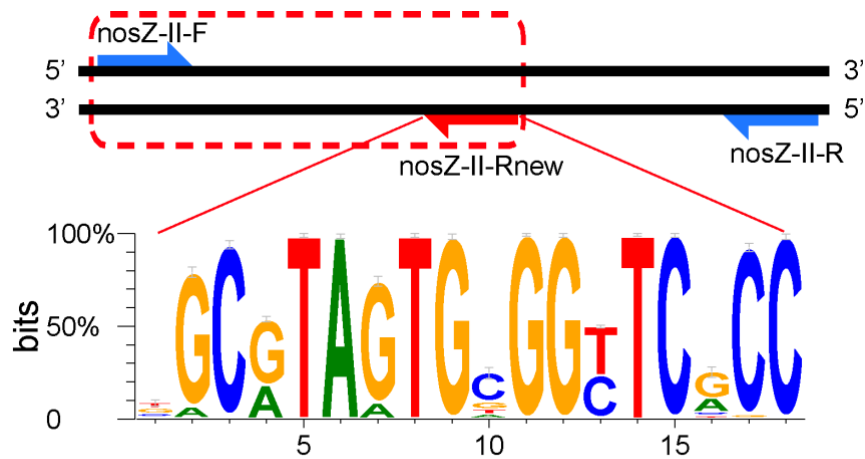

**Fig. S1.** Schematic representation of the clade II *nosZ* gene. The blue arrows indicate the primer binding sites reported by Jones et al. (2013). The red arrow indicates the newly designed reverse primer binding sites in this study. The consensus sequence of the new reverse primer is shown as a SeqLogo diagram, and the frequency of each base is indicated by the percentage. The dashed red box indicates the amplicon of the primer set used in this study.

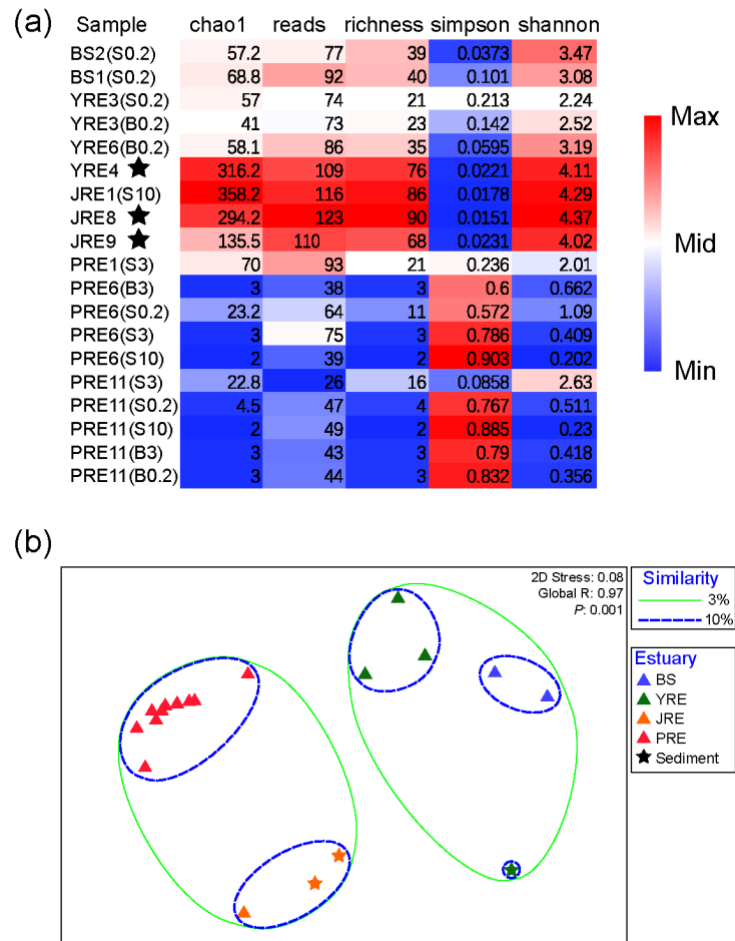

**Fig. S2. (a)** Alpha diversity indices of *nosZ* clade II gene clone libraries retrieved from the four estuaries. Black stars indicate sediment samples. The color bar indicates the levels of the index values. **(b)** Nonmetric multidimensional scaling (NMDS) analysis based on the Bray–Curtis similarity of the top 50 OTUs retrieved from each estuary. Each symbol represents an individual sample. BS, Bohai Sea; YRE, Yangtze River Estuary; JRE, Jiulong River Estuary; PRE, Pearl River Estuary.

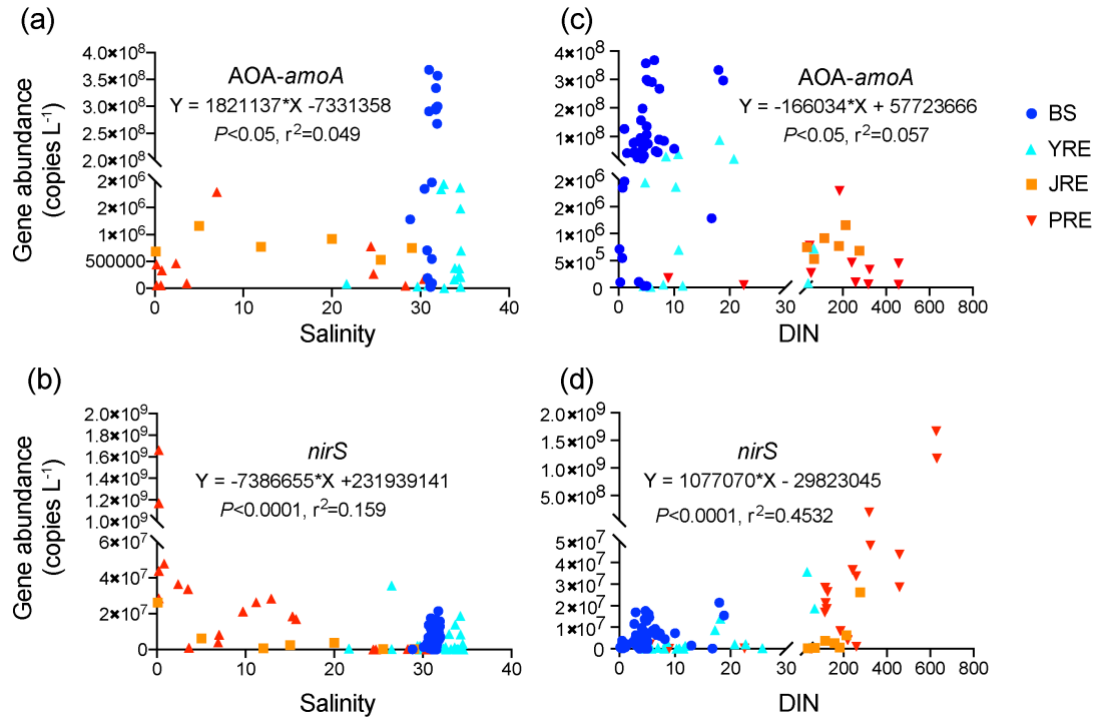

**Fig. S3.** Distribution of **(a, c)** archaeal-*amoA* and **(b, d)** *nirS* genes with **(a, b)** salinity and **(c, d)** the dissolved inorganic nitrogen (DIN). BS, Bohai Sea; YRE, Yangtze River Estuary; JRE, Jiulong River Estuary; PRE, Pearl River Estuary.
