# Supplementary material for: Potential contributions of nitrifiers and denitrifiers to nitrous oxide sources and sinks in China’s estuarine and coastal areas
Source: Copernicus journal article supplement (doi:10.5194/bg-2022-43), 2022-04-13
Supplement: Supplementary file 2 [file Table S1.xlsx]

## Sheet: Table S1
Table S1. Sampling information in the four estuaries. BS, Bohai Sea; YRE, Yangtze River Estuary; JRE, Jiulong River Estuary; PRE, Pearl River Estuary. S, surface layer; M, middle layer; B, bottom layer.
Sample	Region	Station	Longitude (°E)	Latitude (°N)	Layer	Depth (m)	Fraction (µm)	DNA	Water (L)	qPCR	Clone library	RNA	Water (L)	qPCR
BS15S	BS	15	121.31	38.41	S	3	0.22	√	2	√		√	2	√
BS15M	BS	15	121.31	38.41	M	25	0.22	√	2	√		√	2	√
BS15B	BS	15	121.31	38.41	B	47	0.22	√	2	√		√	2	√
BS14S	BS	14	120.99	38.71	S	4	0.22	√	2	√		√	2	√
BS14M	BS	14	120.99	38.71	M	35	0.22	√	2	√		√	2	√
BS14B	BS	14	120.99	38.71	B	63	0.22	√	2	√		√	2	√
BS10S	BS	10	120.95	39.16	S	4	0.22	√	2	√		√	2	√
BS10M	BS	10	120.95	39.16	M	18	0.22	√	2	√		√	2	√
BS10B	BS	10	120.95	39.16	B	33	0.22	√	2	√		√	2	√
BS6S	BS	6	121.11	39.61	S	4	0.22	√	2	√		√	1	√
BS6M	BS	6	121.11	39.61	M	18	0.22	√	2	√		√	1	√
BS6B	BS	6	121.11	39.61	B	34	0.22	√	2	√		√	1	√
BS2S	BS	2	121.6	40.19	S	4	0.22	√	2	√	√	√	2	√
BS2M	BS	2	121.6	40.19	M	11	0.22	√	2	√		√	2	√
BS3B	BS	2	121.6	40.19	B	21	0.22	√	2	√		√	2	√
BS2S	BS	1	121.55	40.48	S	4	0.22	√	2	√	√	√	2	√
BS1B	BS	1	121.55	40.48	B	11	0.22	√	2	√		√	2	√
BS3S	BS	3	120.93	39.91	S	4	0.22	√	2	√		√	2	√
BS3M	BS	3	120.93	39.91	M	15	0.22	√	2	√		√	2	√
BS3B	BS	3	120.93	39.91	B	29	0.22	√	2	√		√	2	√
BS7S	BS	7	120.22	39.33	S	4	0.22	√	2	√		√	2	√
BS7M	BS	7	120.22	39.33	M	11	0.22	√	2	√		√	2	√
BS7B	BS	7	120.22	39.33	B	21	0.22	√	2	√		√	2	√
BS9S	BS	9	119.9	39.06	S	4	0.22	√	2	√		√	2	√
BS9M	BS	9	119.9	39.06	M	11	0.22	√	2	√		√	2	√
BS9B	BS	9	119.9	39.06	B	21	0.22	√	2	√		√	2	√
BS16S	BS	16	119	38.33	S	3	0.22	√	2	√		√	2	√
BS16M	BS	16	119	38.33	M	10	0.22	√	2	√		√	2	√
BS16B	BS	16	119	38.33	B	18	0.22	√	2	√		√	2	√
BS11S	BS	11	118.98	38.99	S	3	0.22	√	2	√		√	2	√
BS11M	BS	11	118.98	38.99	M	10	0.22	√	2	√		√	2	√
BS11B	BS	11	118.98	38.99	B	18	0.22	√	2	√		√	2	√
BS8S	BS	8	119.43	39.17	S	4	0.22	√	2	√		√	2	√
BS8M	BS	8	119.43	39.17	M	11	0.22	√	2	√		√	2	√
BS8B	BS	8	119.43	39.17	B	20	0.22	√	2	√		√	2	√
BS4S	BS	4	119.85	39.55	S	4	0.22	√	2	√		√	2	√
BS4M	BS	4	119.85	39.55	M	12	0.22	√	2	√		√	2	√
BS4B	BS	4	119.85	39.55	B	22	0.22	√	2	√		√	2	√
BS5S	BS	5	120.44	39.48	S	4	0.22	√	2	√		√	2	√
BS5M	BS	5	120.44	39.48	M	13	0.22	√	2	√		√	2	√
BS5B	BS	5	120.44	39.48	B	24	0.22	√	2	√		√	2	√
BS13S	BS	13	120.39	38.72	S	4	0.22	√	2	√		√	2	√
BS13M	BS	13	120.39	38.72	M	14	0.22	√	2	√		√	2	√
BS13B	BS	13	120.39	38.72	B	26	0.22	√	2	√		√	2	√
BS18S	BS	18	120.45	38.34	S	4	0.22	√	2	√		√	2	√
BS18M	BS	18	120.45	38.34	M	11	0.22	√	2	√		√	2	√
BS18B	BS	18	120.45	38.34	B	25	0.22	√	2	√		√	2	√
BS12S	BS	12	119.78	38.72	S	3	0.22	√	2	√		√	2	√
BS12M	BS	12	119.78	38.72	M	13	0.22	√	2	√		√	2	√
BS12B	BS	12	119.78	38.72	B	24	0.22	√	2	√		√	2	√
BS17S	BS	17	119.79	38.34	S	3	0.22	√	2	√		√	2	√
BS17M	BS	17	119.79	38.34	M	13	0.22	√	2	√		√	2	√
BS17B	BS	17	119.79	38.34	B	23	0.22	√	2	√		√	2	√
BS19S	BS	19	119.3	37.98	S	1.5	0.22	√	2	√		√	2	√
BS19B	BS	19	119.3	37.98	B	13	0.22	√	2	√		√	2	√
BS20S	BS	20	119.93	38	S	2	0.22	√	2	√		√	2	√
BS20M	BS	20	119.93	38	M	9	0.22	√	2	√		√	2	√
BS20B	BS	20	119.93	38	B	17	0.22	√	2	√		√	2	√
YRE3S	YRE	3	122.76	30.95	S	5	0.22	√	1.4	√	√	√	1.1	√
YRE3B	YRE	3	122.76	30.95	B	20	0.22	√	1	√	√	√	0.85	√
YRE6S	YRE	6	123.61	30.83	S	5	0.22	√	2.1	√		√	1.7	√
YRE6M	YRE	6	123.61	30.83	M	30	0.22	√	2	√		√	1.55	√
YRE6B	YRE	6	123.61	30.83	B	55	0.22	√	1.5	√	√	√	1.45	√
YRE1S	YRE	1	122.17	31.1	S	3	0.22	√	0.4	√		√	0.45	√
YRE2S	YRE	2	122.37	31.06	S	3	0.22	√	1.3	√		√	0.95	√
YRE2B	YRE	2	122.37	31.06	B	10	0.22	√	1	√		√	0.75	√
YRE4S	YRE	4	122.96	30.95	S	5	0.22	√	1.4	√		√	1.5	√
YRE4M	YRE	4	122.96	30.95	M	10	0.22	√	1.8	√		√	1.5	√
YRE4B	YRE	4	122.96	30.95	B	33	0.22	√	1.25	√		√	1.2	√
YRE4*	YRE	4	122.96	30.95				√			√
YRE7S	YRE	7	123.2	30.79	S	5	0.22	√	1.6	√		√	1.6	√
YRE7M	YRE	7	123.2	30.79	M	25	0.22	√	1.3	√		√	1.3	√
YRE7B	YRE	7	123.2	30.79	B	52	0.22	√	1.5	√		√	1.5	√
YRE5S	YRE	5	123.34	30.92	S	4	0.22	√	1.58	√
YRE5B	YRE	5	123.34	30.92	B	43	0.22	√	1.3	√
YRE8S	YRE	8	123.32	30.51	S	5	0.22	√	1.4	√		√	1.4	√
YRE8M	YRE	8	123.32	30.51	M	18	0.22	√	1.4	√		√	1.4	√
YRE8M2	YRE	8	123.32	30.51	M2	25	0.22	√	1.4	√		√	1.4	√
YRE8B	YRE	8	123.32	30.51	B	53	0.22	√	1.4	√		√	1.4	√
YRE10S	YRE	10	123.35	30.07	S	5	0.22	√	1.3	√
YRE10M	YRE	10	123.35	30.07	M	20	0.22	√	1.3	√
YRE10B	YRE	10	123.35	30.07	B	55	0.22	√	1.3	√
YRE11S	YRE	11	122.76	30.08	S	5	0.22	√	1.2	√
YRE11B	YRE	11	122.76	30.08	B	33	0.22	√	1	√
YRE9S	YRE	9	122.76	30.37	S	3	0.22	√	1	√		√	1	√
YRE9B	YRE	9	122.76	30.37	B	22	0.22	√	0.9	√		√	0.9	√
YRE12S	YRE	12	122.54	29.71	S	5	0.22	√	1	√		√	1	√
YRE12B	YRE	12	122.54	29.71	B	25	0.22	√	0.9	√		√	0.9	√
YRE13S	YRE	13	122.83	29.66	S	3	0.22	√	1.95	√		√	2	√
YRE13M	YRE	13	122.83	29.66	M	10	0.22	√	1.5	√		√	2.5	√
YRE13M2	YRE	13	122.83	29.66	M3	15	0.22	√	1.5	√		√	1.5	√
YRE13B	YRE	13	122.83	29.66	B	45	0.22	√	2.05	√		√	1.7	√
YRE16S	YRE	16	119.99	25.42	S	5	0.22	√	2	√		√	2	√
YRE16M	YRE	16	119.99	25.42	M	15	0.22	√	2	√		√	2	√
YRE16B	YRE	16	119.99	25.42	B	55	0.22	√	2	√		√	2	√
YRE15S	YRE	15	121.78	28	S	5	0.22	√	2	√		√	2	√
YRE15B	YRE	15	121.78	28	B	25	0.22	√	2	√		√	2	√
YRE14S	YRE	14	122	28.74	S	5	0.22	√	1.56	√		√	1.56	√
YRE14B	YRE	14	122	28.74	B	14	0.22	√	1.25	√		√	1.25	√
JRE1S	JRE	1	24.396	117.92	S	0.5	0.22	√	0.3	√		√	0.3	√
JRE2S	JRE	2	24.404	117.897	S	0.5	0.22	√	0.35	√		√	0.35	√
JRE3S	JRE	3	24.397	117.922	S	0.5	0.22	√	0.9	√		√	0.9	√
JRE4S	JRE	4	24.401	117.93	S	0.5	0.22	√	0.8	√		√	0.8	√
JRE5S	JRE	5	24.4	117.95	S	0.5	0.22	√	1.2	√		√	1.2	√
JRE6S	JRE	6	24.419	118.03	S	0.5	0.22	√	1	√		√	1	√
JRE7S	JRE	7	24.376	118.102	S	0.5	0.22	√	1	√		√	1	√
JRE8*	JRE	8	24.448	117.824				√			√
JRE9*	JRE	9	24.398	117.918				√			√
PRE1S	PRE	1	23.09	113.25	S	0.5	0.22	√	0.4	√
PRE1B	PRE	1	23.09	113.25	B	5	0.22	√	0.4	√
PRE2S	PRE	2	23.08	113.46	S	0.5	0.22	√	0.25	√
PRE2B	PRE	2	23.08	113.46	B	8	0.22	√	0.25	√
PRE3S	PRE	3	22.99	113.54	S	0.5	0.22	√	0.5	√
PRE3B	PRE	3	22.99	113.54	B	13	0.22	√	0.3	√
PRE4S	PRE	4	22.94	113.56	S	0.5	0.22	√	0.5	√
PRE4B	PRE	4	22.94	113.56	B	12.5	0.22	√	0.4	√
PRE5S	PRE	5	22.87	113.57	S	0.5	0.22	√	0.9	√
PRE5B	PRE	5	22.87	113.57	B	18	0.22	√	0.5	√
PRE6S0.2	PRE	6	22.79	113.63	S	0.5	0.22	√	0.7	√	√
PRE6B	PRE	6	22.79	113.63	B	12.5	0.22	√	0.2	√
PRE7S	PRE	7	22.68	113.7	S	0.5	0.22	√	0.8	√
PRE7B	PRE	7	22.68	113.7	B	9.4	0.22	√	0.8	√
PRE8S	PRE	8	22.6	113.72	S	0.5	0.22	√	0.9	√
PRE8B	PRE	8	22.6	113.72	B	6.5	0.22	√	0.8	√
PRE9S	PRE	9	22.4	113.77	S	0.5	0.22	√	1.5	√
PRE9B	PRE	9	22.4	113.77	B	11	0.22	√	0.45	√
PRE10S	PRE	10	22.26	113.82	S	0.5	0.22	√	1.8	√
PRE10B	PRE	10	22.26	113.82	B	13.5	0.22	√	1.3	√
PRE11S0.2	PRE	11	22.14	113.8	S	0.5	0.22	√	1.5	√	√
PRE11B0.2	PRE	11	22.14	113.8	B	13.5	0.22	√	1.4	√	√
JRE1S10	JRE	1	24.396	117.92	S	0.5	10	√	0.3		√
PRE1S3	PRE	1	23.09	113.25	S	0.5	3	√	0.4		√
PRE6S10	PRE	6	22.79	113.63	S	0.5	10	√	0.7		√
PRE6S3	PRE	6	22.79	113.63	S	0.5	3	√	0.7		√
PRE6B3	PRE	6	22.79	113.63	B	12.5	3	√	0.2		√
PRE11S10	PRE	11	22.14	113.8	S	0.5	10	√	1.5		√
PRE11S3	PRE	11	22.14	113.8	S	0.5	3	√	1.5		√
PRE11B3	PRE	11	22.14	113.8	B	13.5	3	√	1.4		√
