# Supplementary material for: Potential contributions of nitrifiers and denitrifiers to nitrous oxide sources and sinks in China’s estuarine and coastal areas
Source: Copernicus journal article supplement (doi:10.5194/bg-2022-43), 2022-04-13
Supplement: Supplementary file 3 [file Table S3.xlsx]

## Sheet: Table S3
Table S3. Gene abundance data (copies L-1) in the four estuaries. BS, Bohai Sea; YRE, Yangtze River Estuary; JRE, Jiulong River Estuary; PRE, Pearl River Estuary; AOA, ammonia-oxidizing archaea; AOB, ammonia-oxidizing bacteria; BD, bellow detection. S, surface layer; M, middle layer; B, bottom layer.
Station	AOA-S	AOA-M, M2	AOA-B	AOB-S	AOB-M, M2	AOB-B	nirS-S	nirS-M, M2	nirS-B	nirK-S	nirK-M, M2	nirK-B	nosZI-S	nosZI-M, M2	nosZI-B	nosZII-S	nosZII-M, M2	nosZII-B
BS15	190870	7.17295e+06	7.94648e+07	47219	274658	1.35746e+07	739002	3.80764e+06	6.31356e+06	3.83869e+06	3.00694e+06	3.83771e+06	474406	538405	641862	1.07193e+06	1.13962e+06	1.88079e+06
BS14	1.06737e+07	9.47278e+07	1.56644e+08	263055	7.35606e+06	1.47179e+07	1.38297e+06	5.67033e+06	9.74614e+06	2.39326e+06	3.95573e+06	4.74219e+06	224061	664485	894270	755715	2.58768e+06	3.1675e+06
BS10	95285	1.16918e+07	4.55073e+07	2914.68	1.44779e+06	2.84344e+06	297577	1.69684e+07	5.24938e+06	857124	2.06417e+06	2.18626e+06	504765	1.466e+06	1.2061e+06	227099	2.4261e+06	1.76189e+06
BS6	1.97644e+08	1.35531e+08	2.94224e+08	1.48712e+06	1.79081e+06	4.88549e+06	3.1963e+06	3.32502e+06	1.4537e+07	3.41613e+06	4.10393e+06	7.15936e+06	656746	967809	3.05482e+06	552701	615461	1.28639e+06
BS2	1.06457e+08	3.57112e+08	2.99793e+08	3.32109e+06	4.65462e+06	8.98063e+06	6.42406e+06	1.29669e+07	1.56599e+07	2.11433e+06	1.47496e+06	1.89006e+06	1.19299e+06	3.07308e+06	2.88093e+06	782283	1.0506e+06	814005
BS1	2.97022e+08		3.33525e+08	3.2654e+06		4.81771e+06	1.54677e+07		2.13559e+07	4.27451e+06		3.3486e+06	3.83899e+06		5.14294e+06	5.59664e+06		3.15731e+06
BS3	4.32064e+07	2.67674e+08	8.89068e+07	301134	8.37393e+06	4.84694e+06	1.33197e+06	5.93716e+06	7.20662e+06	1.64162e+06	1.58825e+06	729229	1.21665e+06	2.67674e+08	681320	807430	2.06682e+06	1.11434e+06
BS7	7.67814e+06	4.18472e+07	7.39934e+07	122168	144439	2.49235e+06	2.54001e+06	3.5277e+06	1.60791e+07	4.4259e+06	1.34779e+06	988199	1.24654e+07	1.24767e+06	544932	2.96745e+06	5.37761e+06	1.83079e+06
BS9	1.26782e+08	3.68229e+08	2.9142e+08	126438	3.44863e+06	2.24891e+06	672000	9.22837e+06	8.56922e+06	6.6854e+06	1.8685e+06	2.69679e+06	7.92216e+06	1.18816e+06	1.35056e+06	1.10848e+07	3.13823e+06	2.41254e+06
BS16	2.61394e+07	2.18738e+07	3.19432e+07	514879	1.61856e+06	3.87524e+06	3.55586e+06	6.73647e+06	1.37435e+07	1.57521e+06	1.17424e+06	1.44395e+06	2.15238e+06	1.85791e+06	3.44289e+06	1.82701e+06	2.06351e+06	2.94021e+06
BS11	1.45199e+07	6.18807e+06	2.8635e+06	187181	323810	332867	6.29168e+06	4.60212e+06	6.87915e+06	931648	1.84583e+06	729663	2.12639e+06	1.16619e+06	604383	1.98402e+06	2.37167e+06	2.22376e+06
BS8	1.84776e+06	4.79855e+07	4.41095e+07	164199	1.8452e+06	2.73487e+06	2.89681e+06	6.4293e+06	6.7104e+06	584852	1.01596e+06	2.1101e+06	734075	1.05299e+06	2.36148e+06	1.06065e+06	1.71605e+06	1.81091e+06
BS4	709430	7.62119e+07	7.55739e+07	33898.2	884976	3.10622e+06	726738	1.15729e+07	1.75246e+07	352682	2.26591e+06	55147.6	380544	1.0944e+07	1.54043e+06	1.93285e+06	1.11878e+07	9.29166e+06
BS5	1.77506e+07	1.90091e+07	6.18386e+07	59600.4	412983	1.73542e+06	1.60118e+06	3.39256e+06	7.97982e+06	1.13091e+06	447782	2.92887e+06	643978	992352	1.15326e+06	6.1349e+06	3.95831e+06	4.19757e+06
BS13	545176	4.25155e+06	1.96708e+06	18460.6	65112.1	416453	220969	1.36632e+06	1.56415e+06	112352	255964	110463	114196	337724	90523	428094	1.00945e+06	937983
BS18	5.66475e+06	4.72712e+06	2.22573e+06	11267.4	2.39084e+06	72269.7	127800	84994.6	412842	298627	21898.9	157110	417927	85969	177183	510123	145644	173530
BS12	4.13441e+07	8.38262e+07	5.64241e+07	1.98998e+06	3.77853e+06	3.2116e+06	2.18796e+06	4.51014e+06	7.28006e+06	2.72619e+07	2.30022e+06	3.81088e+06	1.09399e+06	2.03118e+06	1.28011e+06	2.24369e+07	1.55659e+06	1.53854e+06
BS17	8.76697e+06	6.09758e+07	8.02686e+07	544938	4.40941e+06	6.14547e+06	597746	4.77309e+06	7.75475e+06	1.14917e+06	2.16914e+06	2.80339e+06	512134	1.25006e+06	1.12482e+06	537325	1.11126e+06	722447
BS19	1.28289e+06		4.31956e+06				116381		1.48071e+06	124360		208028	61888.1		99880.1	28678.1		128644
BS20	103608	26555.6	28458				23741.3	51506.5	45516.6	22705.2	16539.8	13088.9	7582.34	25619.7	7384.99	6546.97	9165.99	7183.59
YRE3	2.03147e+07	9.94159e+06		7.28652e+06	2.29701e+07		2.02311e+06	8.60493e+06		147230	123568		44830.2	210495		1.91547e+06	2.79215e+06
YRE6	166478	1.62016e+07	2.91634e+07	16037.4	BD	8.33653e+06	164978	217555	3.22758e+06	26831.3	80359.4	68651.3	4702.71	11661.7	119908	718835	2.106e+06	1.63988e+06
YRE1	720725			5.85117e+06			1.86206e+07			200344			141806	BD		3.32599e+06
YRE2	81780.6	1.30928e+07		862583	5.0992e+07		612336	3.56191e+07		108067	256330		21947.6	421997		788720	8.11093e+06
YRE4	4.50954e+06	4.75845e+06	3.78953e+07	830199	5.27933e+06	1.86981e+07	2.17103e+06	621165	8.39628e+06	2.69867e+06	891021	38933	154427	19686.3	172594	6.7403e+06	810172	2.23609e+06
YRE7	4860.85	242537	378388	26865.5	41231.9	58041.5	14266.2	18259.5	31038.3	710.502	765.708	957.163	432.711	890.461	1582.96	47607.9	13197.2	14918
YRE5	32445.9	1.47507e+06		BD	310931	BD	13367.1	122935		6211.3	3205.73		1961.46	11383.1		59936.8	78294.2
YRE8	1.94481e+06	2.52E+04, 2.10E+05	6.9714e+06	45432.5	BD, BD	1.05644e+06	151977	BD, 2.71E+04	440243	47427.6	1.24E+03, 5.50E+03	19083.5	3220.65	4.50E+02, BD	35166.1	872330	6.14E+03, 8.11E+04	283501
YRE10	50773.2	1.86781e+06	5420000	BD	109886	897196	29298	17425.4	194373	10773	2764.96	11012.1	1798.87	2329.63	14717.8	156102	43297.6	209826
YRE11	8.57198e+06	3.45226e+06		1.59061e+06	2.94668e+06		1.12877e+06	1.13156e+06		940650	34070.9		23684.5	40816.2		8.096e+06	729317
YRE9	3.25882e+06	8.66859e+07		BD	2.305e+07		283496	1.39157e+07		46322.7	267858		11469.4	532342		779456	7.06742e+06
YRE12	1.84438e+06	3.67633e+07		2370.95	90193.8		744828	1.87648e+07		59677.5	234997		53586.2	493373		1.93073e+06	7.9121e+06
YRE13	9.46656e+07	2.43E+05, 8.99E+04	3.67999e+06	BD	BD, BD	1537.74	245762	4.28E+04, 2.90E+04	170874	63593.6	1.25E+04, 6.56E+03	9512.97	3153.19	6.42E+03, BD	10727.5	334907	3.59E+05, 2.18E+05	142198
YRE16	377324	4.06105e+06	1.53343e+07	BD	153.441	1274.11	158667	236993	351129	39587.8			4314.81	18623	26872.5	1.02654e+06	1.58862e+06	6.03096e+06
YRE15	2.54783e+06	6.89874e+07		BD	BD		148591	2.09137e+06		44702.6	187632		12188.6	89143.6		572606	1.74766e+06
YRE14	7.00472e+06	1.0826e+07		812.261	5177.88		397275	1.36753e+06					8727.92	38287.8		357334	972345
JRE1	682165			580954			2.6271e+07			482615			232356			BD
JRE2	1.15564e+06			408389			6.28637e+06			89950.5			44336.4			BD
JRE3	767750			67970.3			702691			40479.2			7145.68			BD
JRE4	4.40019e+06			258400			2.60047e+06			48406.9			38368.5			BD
JRE5	916972			167212			3.77743e+06			122119			55086.2			BD
JRE6	528370			60513.8			380374			10798.6			16729.7			BD
JRE7	749401			16321.8			257177			4592.44			25769.4			BD
PRE1	3.138e+06		6.87595e+06	39386.9		14928.2	1.66348e+09		1.17355e+09	9.70397e+06		8.30146e+06	2.28732e+06		2.11696e+06	BD		BD
PRE2	445666		54380.2	46327		16555.9	1.98643e+08		4.79274e+07	693985		433254	717402		385578	2.72998e+06		1.62474e+06
PRE3	56446.5		335710	45811.5		132312	2.85732e+07		4.37653e+07	76487.7		437084	95866		117326	820732		1.73831e+06
PRE4	461415		94279.1	31850.9		9083.13	3.65409e+07		1.06061e+06	341808		48956.8	148923		80555.9	2.00492e+06		4.05931e+06
PRE5	4.21791e+06		2.86665e+06	8212.63		5780.99	3.37463e+07		4.04694e+06	538623		144132	153760		113017	682202		604123
PRE6	1.78974e+06		1.25632e+07	2693.24		69499.4	8.24381e+06		2.64152e+07	99511.1		294021	38907.6		20283.5	312853		94267.5
PRE7	3.26521e+06		5.66327e+06	7805.13		10296.7	2.11981e+07		2.83703e+07	404748		442370	9935.35		16430.4	395025		5.75627e+06
PRE8	3.09123e+06		2.43476e+06	5891.98		3398.28	1.84775e+07		1.69097e+07	308480		274425	9216.75		8519.99	7.71667e+06		1.16727e+07
PRE9	780403		269348	2204.78		1102.59	34751.3		85466.8	2518.13		1785.62	750.101		6851.84	4.31105e+06		99145.8
PRE10	45912.2		173357	805.237		1107.71	259391		171756	5671.87		2430.63	1440.82		3066.01	71747.2		41966.2
PRE11	7.39273e+06		7.14293e+06	4844.33		7296.61	2.12607e+06		1.89865e+06	31286.5		91067.2	21427.5		24859.1	2.63268e+06		1.05765e+07
