# Supplementary material for: Potential contributions of nitrifiers and denitrifiers to nitrous oxide sources and sinks in China’s estuarine and coastal areas
Source: Copernicus journal article supplement (doi:10.5194/bg-2022-43), 2022-04-13
Supplement: Supplementary file 4 [file Table S4.xlsx]

## Sheet: Table S4
Table S4. Gene transcript data (transcripts L-1) in the four estuaries. BS, Bohai Sea; YRE, Yangtze River Estuary; JRE, Jiulong River Estuary; PRE, Pearl River Estuary; AOA, ammonia-oxidizing archaea; AOB, ammonia-oxidizing bacteria; BD, bellow detection. S, surface layer; M, middle layer; B, bottom layer.
Station	AOA-S	AOA-M, M2	AOA-B	AOB-S	AOB-M, M2	AOB-B	nirS-S	nirS-M, M2	nirS-B	nirK-S	nirK-M, M2	nirK-B	nosZI-S	nosZI-M, M2	nosZI-B	nosZII-S	nosZII-M, M2	nosZII-B
BS15	BD	227000	1620000	BD	613	39600	BD	1800	6760	BD	281	1110	BD	32.57	114.22	BD	BD	BD
BS14	37900	393000	1180000	52.2	18900	73300	6680	3340	12600	1290	595	1510	47.77	20.99	114.53	BD	BD	BD
BS10	3510	113000	28000	0.73	383	227	3800	16700	16000	722	2200	1030	42.84	87.86	103.41	BD	BD	BD
BS6	945000	406000	140000	105	338	235	8900	9650	25400	1440	1070	818	142.68	85.88	479.56	BD	BD	BD
BS2	166000	279000	54300	140	145	3.96	7930	17400	9270	890	711	243	113.02	111.3	139.78	BD	BD	BD
BS1	28100		21800	269		84.7	8520		12800	485		1160	177.42		149.55	BD		BD
BS3	1110000	151000	62800	82.6	3890	416	5910	3010	16500	2070	747	1460	142.53	69.61	203.45	BD	BD	BD
BS7	32500	66100	514000	6.4	52	413	844	4380	7000	918	1540	2790	247.03	96.88	621.53	BD	BD	BD
BS9	34700	987000	791000	BD	1000	410	4140	3440	4600	737	3760	592	1477.21	1012.39	26.18	BD	BD	BD
BS16	315000	286000	169000	583	534	323	13500	6700	19900	1710	943	1250	127.68	45.08	169.71	BD	BD	BD
BS11	171000	228000	132000	102	174	164	11800	14200	5750	1690	1450	1030	151.94	185.46	118.71	BD	BD	BD
BS8	105000	782000	932000	150	1070	2230	3510	5680	13100	1350	1800	1120	385.29	135.6	190.57	BD	BD	BD
BS4	11700	683000	191000	24.7	264	227	2550	5300	2120	724	919	968	36.42	8.92	208.36	BD	BD	BD
BS5	18500	211000	227000	3.6	511	684	3810	23600	27500	389	1770	1820	83.25	265.47	373.39	BD	BD	BD
BS13	35700	25900	24400	76.8	BD	99.5	7000	5130	5320	2040	911	513	344.03	115.28	76.28	BD	BD	BD
BS18	117000	362000	344000	156	453	724	10000	6440	53400	1410	954	1020	93.01	251.21	461.6	BD	BD	BD
BS12	15100	310000	196000	95.2	4070	749	2350	3330	13700	4870	1630	2480	258.14	607.48	155.35	BD	BD	BD
BS17	21500	349000	176000	97.6	3660	1510	6780	20300	6510	685	1230	904	213.68	240.41	100.59	BD	BD	BD
BS19	124000		72600	149		131	3320		8110	2930		935	128.11		110.51	BD		BD
BS20	4780	20700	45800	BD	123	247	6080	16000	11900	1780	1640	1340	367.43	135.86	79.16	BD	BD	BD
YRE3	266000	28100		9890	800		8630	27200		BD	395		BD	985.39		BD	BD
YRE6	432	615000	84600	81	83.7	301	4030	3130	17400	200	122	293	BD	BD	BD	BD	181000	BD
YRE1	303			BD			BD			BD			622			BD
YRE2	67600	1840		149	168		7500	5720		591	153		BD	BD		BD	BD
YRE4	60500	265000	37100	1080	14400	823	3430	7140	9390	1380	671	76.7	301	BD	BD	BD	BD	BD
YRE7	1760	476000	61400	BD	1090	163	3020	6640	4400	BD	BD	BD	BD	292	BD	22400	10400	4590
YRE8	47700	1.74E+05, BD	225000	27.2	7.48E+01, 7.23E+00	51.3	3090	9.29E+03, 4.95E+03	2520	176	4.25E+02, BD	BD	99.4	BD, BD	BD	104000	25800	BD
YRE9	164000	4610		205	43.2		2230	1460		97.4	BD		BD	BD		BD	BD
YRE12	280000	31500		2290	140		6550	18000		502	500		8510	BD		71300	BD
YRE13	18500	7.08E+03, BD	14100	BD	BD, BD	BD	28600	7.84E+03, 3.65E+03	1780	158	1.85E+03, 7.13E+02	60.4	BD	BD, BD	101	37000	BD, BD	BD
YRE16	3190	183000	29400	BD	BD	BD	1310	1460	964	471	153	BD	BD	BD	BD	55400	11900	BD
YRE15	25900	19900		59.8	67		1670	2240		222	60.2		86.3	272		23300	BD
YRE14	110000	495		75.4	BD		2860	742		144	BD		BD	BD		13700	BD
JRE1	8500			706000			596000						1230			BD
JRE2	35000			4970000			3.56824e+06						4690			BD
JRE3	51200			21500000			8.9466e+06						53700			BD
JRE4	27600			41700000			1.02601e+07						7890			BD
JRE5	148000			82200000			1.5247e+07						46500			BD
JRE6	432000			5390000			1.66003e+07						3830			BD
JRE7	1480000			22700000			2.30629e+07						4440			BD
